# Supplementary material for: Dietary sugar consumption and health: umbrella review
Source: PubMed Central journal article supplement (PMC10074550; doi:10.1136/bmj-2022-071609), 2023-04-05
Supplement: huay071609.ww1.pdf [file huay071609.ww1.pdf]

Supplementary Table A. Associations between dietary sugars consumption and endocrine &amp; metabolic outcomes.

| Outcome                             | Category     | Total eligible MA | Included MA             | No. of cases/total        | MA metric        | Estimates [95% CI]    | No. of studies (T/R/C/P) | Effects model | $I^2$ ; $Q$ test $P$ | Egger test $P$ value |
|-------------------------------------|--------------|-------------------|-------------------------|---------------------------|------------------|-----------------------|--------------------------|---------------|----------------------|----------------------|
| <b>Significant associations</b>     |              |                   |                         |                           |                  |                       |                          |               |                      |                      |
| Δ BMI <sup>a</sup>                  | SSB          | 3                 | Malik 2013              | NA/25,745                 | WMD <sup>b</sup> | 0.07 [0.01-0.12]      | 20/0/20/0                | random        | 91.6%; < 0.001       | NA                   |
| Δ Body weight                       | SSB          | 2                 | Malik 2013              | NA/292 <sup>c</sup>       | WMD <sup>d</sup> | 0.85 [0.50-1.20]      | 6/6/0/0                  | fixed         | 0.0%; 0.780          | NA                   |
| Δ Body weight (one year)            | SSB          | 1                 | Malik 2013              | NA/174,252                | WMD <sup>b</sup> | 0.22 [0.09-0.34]      | 8/0/8/0                  | random        | 70.2%; 0.001         | NA                   |
| Gout                                | SSB          | 3                 | Ebrahimpour-koujan 2020 | NA/141,091                | RR <sup>d</sup>  | 1.35 [1.18-1.55]      | 3/0/3/0                  | random        | 40.1%; 0.188         | 0.766                |
| Gout (dose-response)                | SSB          | 2                 | Ayoub-Charette 2019     | 1,533/125,299             | RR <sup>e</sup>  | 1.04 [1.02-1.07]      | 2/0/2/0                  | random        | 0%; 0.52             | NA                   |
| HDL-C                               | SSB          | 1                 | Nikniaz 2021            | 8,548/24,119 <sup>f</sup> | WMD <sup>d</sup> | -1.46 [-2.25-(-0.67)] | 14/0/1/13                | random        | 99.3%; < 0.001       | 0.65                 |
| Hyperuricemia                       | SSB          | 1                 | Ebrahimpour-koujan 2020 | NA/63,246 <sup>c</sup>    | RR <sup>d</sup>  | 1.35 [1.19-1.52]      | 6/0/0/6                  | random        | 41.4%; 0.129         | 0.214                |
| LADA                                | SSB          | 1                 | El-Malky 2020           | 1,862/8,133 <sup>c</sup>  | OR <sup>d</sup>  | 1.26 [1.12-1.41]      | 6/0/0/6                  | random        | 73.1%; < 0.001       | 0.75                 |
| LDL-C                               | SSB          | 1                 | Nikniaz 2021            | 7,185/18,668 <sup>f</sup> | WMD <sup>d</sup> | 1.21 [0.23-2.20]      | 9/0/1/8                  | random        | 97.2%; < 0.001       | 0.65                 |
| Metabolic syndrome                  | SSB          | 4                 | Semnani-Azad 2020       | 7,138/19,079              | RR <sup>e</sup>  | 1.14 [1.05-1.23]      | 6/0/6/0                  | random        | 79.3%; 0.001         | NA                   |
| Obesity <sup>a</sup>                | SSB          | 1                 | Morenga 2013            | NA/12,317                 | OR <sup>h</sup>  | 1.55 [1.32-1.82]      | 7/0/7/0                  | random        | 0%; 0.69             | NA                   |
| Obesity                             | SSB          | 2                 | Qin 2020                | 11,821/56,579             | RR <sup>i</sup>  | 1.12 [1.05-1.19]      | 7/0/7/0                  | random        | 67.7%; 0.005         | 0.007                |
| Serum uric acid                     | SSB          | 1                 | Ebrahimpour-koujan 2021 | NA/26,260 <sup>c</sup>    | WMD <sup>d</sup> | 0.18 [0.11-0.25]      | 6/0/0/6                  | random        | 0.0%; 0.698          | NA                   |
| T2DM                                | SSB          | 9                 | Meng 2021               | 15,768/445,040            | RR <sup>b</sup>  | 1.27 [1.15-1.41]      | 16/0/16/0                | random        | 80.8%; < 0.001       | 0.016                |
| TC                                  | SSB          | 1                 | Nikniaz 2021            | 6,845/17,728 <sup>c</sup> | WMD <sup>d</sup> | -2.49 [-2.89-(-2.10)] | 7/0/0/7                  | random        | 77.3%; < 0.001       | 0.51                 |
| Gout                                | Fructose     | 3                 | Jamnik 2016             | 1,553/125,299             | RR <sup>d</sup>  | 1.62 [1.28-2.03]      | 2/0/2/0                  | fixed         | 0%; 0.33             | NA                   |
| Hyperuricemia                       | Fructose     | 3                 | Li 2018                 | 2,655/17,684 <sup>c</sup> | OR <sup>d</sup>  | 1.85 [1.66-2.07]      | 4/0/0/4                  | fixed         | 31%; 0.23            | NA                   |
| T2DM                                | Sucrose      | 1                 | Tsilas 2017             | 3,833/107,972             | RR <sup>j</sup>  | 0.92 [0.85-0.99]      | 6/0/6/0                  | random        | 12%; 0.34            | NA                   |
| Liver fat accumulation              | Added sugars | 1                 | Ma 2016                 | NA/104 <sup>c</sup>       | SMD <sup>h</sup> | 0.93 [0.64-1.21]      | 8/8/0/0                  | random        | 0.0%; 0.754          | > 0.05               |
| Muscle fat accumulation             | Added sugars | 1                 | Ma 2016                 | NA/80 <sup>c</sup>        | SMD <sup>h</sup> | 0.63 [0.23-1.04]      | 5/5/0/0                  | random        | 41.7%; 0.143         | > 0.05               |
| <b>Non-significant associations</b> |              |                   |                         |                           |                  |                       |                          |               |                      |                      |
| Δ BMI                               | SSB          | 1                 | Mattes 2011             | NA/2,722 <sup>c</sup>     | SMD <sup>k</sup> | -0.004 [-0.079-0.072] | 6/6/0/0                  | fixed         | 22.36%; 0.266        | NA                   |
| TG                                  | SSB          | 1                 | Nikniaz 2021            | 8,232/21,392 <sup>f</sup> | WMD <sup>d</sup> | 5.29 [-0.52-11.10]    | 13/0/1/12                | random        | 99.7%; < 0.001       | 0.97                 |
| Large waist circumference           | SSB          | 1                 | Ardeshirlarijani 2021   | 6,580/24,007              | RR <sup>d</sup>  | 1.14 [0.86-1.51]      | 10/0/10/0                | random        | 90.8%; < 0.001       | NA                   |
| Δ Body weight                       | Fructose     | 1                 | Sievenpiper 2012        | 201/216 <sup>c</sup>      | WMD <sup>h</sup> | -0.13 [-0.37-0.10]    | 13/13/0/0                | random        | 8%; 0.37             | > 0.05               |
| Postprandial TG                     | Fructose     | 1                 | Wang 2014               | NA/154 <sup>c</sup>       | SMD <sup>h</sup> | 0.30 [0.00-0.60]      | 5/5/0/0                  | random        | 70%; 0.01            | 0.514                |
| Serum uric acid                     | Fructose     | 1                 | Wang 2012               | 169/172 <sup>c</sup>      | WMD <sup>h</sup> | 1.28 [-6.65-9.22]     | 9/9/0/0                  | random        | 1%; 0.43             | 0.95                 |
| T2DM                                | Fructose     | 1                 | Tsilas 2017             | 3,833/107,972             | RR <sup>d</sup>  | 1.04 [0.84-1.29]      | 6/0/6/0                  | random        | 71%; < 0.01          | NA                   |
| T2DM                                | Total sugars | 1                 | Tsilas 2017             | 13,727/105,846            | RR <sup>d</sup>  | 0.91 [0.76-1.09]      | 12/0/12/0                | random        | 76%; < 0.001         | 0.4                  |

MA, meta-analysis; CI, confidence interval; T, total No. of studies; R, randomized controlled trial; C, cohort studies; P, population-based case-control and/or cross-sectional studies; Δ, final value – baseline value; BMI, body mass index; SSB, sugar-sweetened beverage; WMD, weighted mean difference; NA, not available; RR, relative risk; HDL-C, high-density lipoprotein cholesterol; LADA, latent autoimmune diabetes in adults; OR, odds ratio; LDL-C, low-density lipoprotein cholesterol; T2DM, type 2 diabetes mellitus; TC, total cholesterol; SMD, standardized mean difference; TG, triglycerides.

<sup>a</sup> Children.

<sup>b</sup> 1 serving/d increment.

<sup>c</sup> Case/control.

<sup>d</sup> Highest versus lowest.

<sup>e</sup> 1 serving/week increment.

<sup>f</sup> Case-control/cross-sectional and cohort studies.

---

<sup>g</sup> 355 mL/d increment.

<sup>h</sup> Any versus none.

<sup>i</sup> 250 mL/d increment.

<sup>j</sup> 25 g/d increment.

<sup>k</sup> Reducing SSB consumption versus not reducing.

Supplementary Table B. Associations between dietary sugars consumption and cardiovascular outcomes.

| Outcome                             | Category     | Total eligible MA | Included MA    | No. of cases/total         | MA metric        | Estimates [95% CI] | No. of studies (T/C/P) | Effects model | $I^2$ ; $Q$ test $P$ | Egger test $P$ value |
|-------------------------------------|--------------|-------------------|----------------|----------------------------|------------------|--------------------|------------------------|---------------|----------------------|----------------------|
| <b>Significant associations</b>     |              |                   |                |                            |                  |                    |                        |               |                      |                      |
| CHD                                 | SSB          | 2                 | Bechthold 2017 | 9,135/173,752              | RR <sup>a</sup>  | 1.17 [1.11-1.23]   | 4/4/0                  | random        | 0%; 0.66             | NA                   |
| CVD                                 | SSB          | 4                 | Yin 2021       | 16,999/329,791             | RR <sup>b</sup>  | 1.08 [1.02-1.14]   | 7/7/0                  | random        | 43.0%; 0.07          | NA                   |
| CVD mortality                       | SSB          | 4                 | Zhang 2021     | 24,365/898,005             | HR <sup>b</sup>  | 1.08 [1.04-1.12]   | 13/13/0                | random        | 16.4%; 0.28          | 0.066                |
| Hypertension <sup>c</sup>           | SSB          | 1                 | Farhangi 2020  | 19,375/70,728 <sup>d</sup> | OR <sup>e</sup>  | 1.36 [1.14-1.63]   | 5/0/5                  | random        | 0.0%; 0.976          | 0.127                |
| Hypertension                        | SSB          | 7                 | Liu 2019       | 120,553/427,630            | RR <sup>f</sup>  | 1.11 [1.09-1.13]   | 13/13/0                | random        | 73%; < 0.001         | 0.02                 |
| MI                                  | SSB          | 1                 | Narain 2016    | NA/171,189                 | RR <sup>e</sup>  | 1.19 [1.09-1.31]   | 4/4/0                  | random        | 0%; 0.56             | NA                   |
| Δ SBP <sup>e</sup>                  | SSB          | 1                 | Farhangi 2020  | 25,772/84,054 <sup>g</sup> | WMD <sup>e</sup> | 1.67 [1.02-2.32]   | 15/4/11                | random        | 99.8%; < 0.001       | 0.267                |
| Stroke                              | SSB          | 2                 | Bechthold 2017 | 12,160/289,406             | RR <sup>a</sup>  | 1.07 [1.02-1.12]   | 6/6/0                  | random        | 0%; 0.59             | NA                   |
| CVD mortality                       | Fructose     | 1                 | Khan 2019      | 10,894/353,751             | RR <sup>e</sup>  | 1.08 [1.01-1.15]   | 2/2/0                  | random        | 0%; 0.90             | NA                   |
| CVD mortality                       | Sucrose      | 1                 | Khan 2019      | 10,894/353,751             | RR <sup>e</sup>  | 0.94 [0.89-0.99]   | 2/2/0                  | random        | 0%; 0.76             | NA                   |
| CVD mortality                       | Total sugars | 1                 | Khan 2019      | 11,393/362,607             | RR <sup>e</sup>  | 1.09 [1.02-1.17]   | 4/4/0                  | random        | 0%; 0.97             | NA                   |
| <b>Non-significant associations</b> |              |                   |                |                            |                  |                    |                        |               |                      |                      |
| Δ DBP <sup>e</sup>                  | SSB          | 1                 | Farhangi 2020  | 25,702/83,741 <sup>g</sup> | WMD <sup>e</sup> | 0.31 [-0.13-0.76]  | 14/4/10                | random        | 99.7%; < 0.001       | 0.592                |
| Heart failure                       | SSB          | 1                 | Bechthold 2017 | 5,493/46,890               | RR <sup>e</sup>  | 1.11 [0.88-1.39]   | 2/2/0                  | random        | 81%; 0.02            | NA                   |
| Hypertension                        | Fructose     | 1                 | Jayalath 2014  | 58,162/97,315              | RR <sup>e</sup>  | 1.02 [0.99-1.04]   | 3/3/0                  | random        | 0%; 0.59             | 0.632                |
| CVD                                 | Sucrose      | 1                 | Khan 2019      | 3,682/101,966              | RR <sup>e</sup>  | 1.10 [0.99-1.22]   | 3/3/0                  | random        | 0%; 0.43             | NA                   |
| CVD mortality                       | Added sugars | 1                 | Khan 2019      | 11,725/365,484             | RR <sup>e</sup>  | 1.03 [0.85-1.26]   | 4/4/0                  | random        | 75.1%; 0.007         | NA                   |
| CVD                                 | Total sugars | 1                 | Khan 2019      | 8,174/167,430              | RR <sup>e</sup>  | 1.01 [0.90-1.13]   | 8/8/0                  | random        | 0%; 0.86             | NA                   |

MA, meta-analysis; CI, confidence interval; T, total No. of studies; C, cohort studies; P, population-based case-control and/or cross-sectional studies; CHD, coronary heart disease; SSB, sugar-sweetened beverage; RR, relative risk; NA, not available; CVD, cardiovascular disease; HR, hazard ratio; OR, odds ratio; MI, myocardial infarction; Δ, final value – baseline value; SBP, systolic blood pressure; WMD, weighted mean difference; DBP, diastolic blood pressure.

<sup>a</sup> 250 mL/d increment.

<sup>b</sup> 1 serving/d increment.

<sup>c</sup> Children and adolescence.

<sup>d</sup> Case/control.

<sup>e</sup> Highest versus lowest.

<sup>f</sup> 355 mL/d increment.

<sup>g</sup> Case-control/cross-sectional and cohort studies.

Supplementary Table C. Associations between dietary sugars consumption and cancer outcomes.

| Outcome                             | Category     | Total eligible MA | Included MA  | No. of cases/total         | MA metric       | Estimates [95% CI]  | No. of studies (T/C/P) | Effects model | $I^2$ ; $Q$ test $P$ | Egger test $P$ value |
|-------------------------------------|--------------|-------------------|--------------|----------------------------|-----------------|---------------------|------------------------|---------------|----------------------|----------------------|
| <b>Significant associations</b>     |              |                   |              |                            |                 |                     |                        |               |                      |                      |
| Breast cancer                       | SSB          | 2                 | Llaha 2021   | 4,464/169,424 <sup>a</sup> | RR <sup>b</sup> | 1.14 [1.01-1.30]    | 6/4/2                  | random        | 0.0%; 0.69           | NA                   |
| Breast cancer mortality             | SSB          | 1                 | Li 2021      | NA                         | RR <sup>b</sup> | 1.17 [1.03-1.34]    | 2/2/0                  | random        | 0%; 0.611            | NA                   |
| Glioma                              | SSB          | 1                 | Li 2021      | 678/1,156,603              | RR <sup>b</sup> | 0.81 [0.66-0.99]    | 2/2/0                  | random        | 0%; 0.774            | NA                   |
| Hepatocellular carcinoma            | SSB          | 1                 | Li 2021      | 372/477,114 <sup>a</sup>   | RR <sup>b</sup> | 2.00 [1.33-3.03]    | 2/1/1                  | random        | 0%; 0.526            | NA                   |
| Prostate cancer                     | SSB          | 2                 | Li 2021      | 4,287/78,214               | RR <sup>b</sup> | 1.17 [1.07-1.28]    | 6/6/0                  | random        | 0%; 0.800            | NA                   |
| Overall cancer risk                 | SSB          | 1                 | Li 2021      | 24,482/5,505,812           | RR <sup>c</sup> | 1.04 [1.01-1.09]    | 20/20/0                | random        | 68.5%; 0.032         | 0.005                |
| Overall cancer mortality            | SSB          | 2                 | Li 2021      | 57,567/1,239,183           | RR <sup>b</sup> | 1.06 [1.00-1.12]    | 10/10/0                | random        | 50.9%; 0.018         | 0.869                |
| Pancreatic cancer                   | Fructose     | 1                 | Aune 2012    | 2,430/1,031,605            | RR <sup>d</sup> | 1.22 [1.08-1.37]    | 6/6/0                  | random        | 0%; 0.43             | 0.22                 |
| <b>Non-significant associations</b> |              |                   |              |                            |                 |                     |                        |               |                      |                      |
| Biliary track cancer                | SSB          | 1                 | Li 2021      | 450/538,545                | RR <sup>b</sup> | 1.01 [0.90-1.13]    | 2/2/0                  | random        | 58.9%; 0.045         | NA                   |
| Bladder cancer                      | SSB          | 1                 | Li 2021      | 3,039/236,548 <sup>a</sup> | RR <sup>b</sup> | 1.14 [0.98-1.33]    | 6/1/5                  | random        | 0%; 0.515            | NA                   |
| Colon cancer                        | SSB          | 1                 | Zhang 2010   | 4,895/704,133              | RR <sup>e</sup> | 1.00 [0.91-1.10]    | 13/13/0                | random        | 0%; 0.57             | NA                   |
| Colorectal cancer                   | SSB          | 2                 | Li 2021      | 5,564/300,830              | RR <sup>b</sup> | 1.07 [0.97-1.18]    | 6/6/0                  | random        | 28.3%; 0.193         | NA                   |
| Colorectal cancer mortality         | SSB          | 1                 | Li 2021      | 5,564/300,830              | RR <sup>b</sup> | 1.09 [0.90-1.33]    | 6/6/0                  | random        | 64.7%; 0.006         | NA                   |
| Endometrial cancer                  | SSB          | 1                 | Li 2021      | 762/58,632                 | RR <sup>b</sup> | 1.21 [0.73-1.99]    | 2/2/0                  | random        | 63.6%; 0.064         | NA                   |
| Esophageal cancer                   | SSB          | 1                 | Li 2021      | 2,705/486,641 <sup>a</sup> | RR <sup>b</sup> | 0.84 [0.63-1.12]    | 5/1/4                  | random        | 59%; 0.099           | NA                   |
| Gastric cancer                      | SSB          | 1                 | Li 2021      | 620/517,156                | RR <sup>b</sup> | 0.94 [0.73-1.22]    | 2/2/0                  | random        | 0.0%; 0.637          | NA                   |
| Hematologic malignancy              | SSB          | 1                 | Li 2021      | 3,144/225,470              | RR <sup>b</sup> | 1.09 [0.92-1.30]    | 2/2/0                  | random        | 10.4%; 0.347         | NA                   |
| Kidney cancer                       | SSB          | 1                 | Li 2021      | 1,624/810,545              | RR <sup>b</sup> | 1.14 [0.94-1.38]    | 2/2/0                  | random        | 0%; 0.511            | NA                   |
| Lung cancer mortality               | SSB          | 1                 | Li 2021      | NA                         | RR <sup>b</sup> | 0.99 [0.86-1.13]    | 2/2/0                  | random        | 0%; 0.557            | NA                   |
| Nasopharyngeal carcinoma            | SSB          | 1                 | Li 2021      | 683/482,157 <sup>a</sup>   | RR <sup>b</sup> | 0.81 [0.66-1.00]    | 2/1/1                  | random        | 0%; 0.941            | NA                   |
| Pancreatic cancer                   | SSB          | 4                 | Li 2021      | 4,830/1,829,463            | RR <sup>b</sup> | 1.16 [0.92-1.47]    | 6/6/0                  | random        | 71.7%; 0.003         | NA                   |
| Prostate cancer mortality           | SSB          | 1                 | Li 2021      | NA                         | RR <sup>b</sup> | 0.96 [0.79-1.17]    | 2/2/0                  | random        | 0%; 0.791            | NA                   |
| Colorectal cancer                   | Added sugars | 1                 | Galeone 2012 | 3,897/435,686              | RR <sup>b</sup> | 1.01 [0.90-1.13]    | 2/2/0                  | random        | 0.0%; 0.801          | NA                   |
| Pancreatic cancer                   | Sucrose      | 1                 | Aune 2012    | 2,801/1,092,616            | RR <sup>d</sup> | 1.05 [0.92-1.19]    | 8/8/0                  | random        | 53%; 0.04            | 0.71                 |
| Ovarian cancer                      | Lactose      | 1                 | Liu 2015     | NA                         | OR <sup>b</sup> | 1.084 [0.924-1.272] | 14/14/0                | random        | NA; NA               | 0.054                |

MA, meta-analysis; CI, confidence interval; T, total No. of studies; C, cohort studies; P, population-based case-control and/or cross-sectional studies; SSB, sugar-sweetened beverage; RR, relative risk; NA, not available;

OR, odds ratio.

<sup>a</sup> Case-control/cross-sectional and cohort studies.

<sup>b</sup> Highest versus lowest.

<sup>c</sup> 1 serving/d increment.

<sup>d</sup> 25 g/d increment.

<sup>e</sup> 375 g/d increment.

Supplementary Table D. Associations between dietary sugars consumption and other outcomes.

| Outcome                             | Category     | Total eligible MA | Included MA        | No. of cases/total          | MA metric        | Estimates [95% CI]    | No. of studies<br>(T/R/C/P) | Effects model | $I^2$ ; $Q$ test $P$ | Egger test $P$ value |
|-------------------------------------|--------------|-------------------|--------------------|-----------------------------|------------------|-----------------------|-----------------------------|---------------|----------------------|----------------------|
| <b>Significant associations</b>     |              |                   |                    |                             |                  |                       |                             |               |                      |                      |
| All-cause mortality                 | SSB          | 6                 | Pan 2021           | NA/1,088,524                | HR <sup>a</sup>  | 1.04 [1.02-1.06]      | 11/0/11/0                   | random        | 88%; < 0.001         | NA                   |
| Asthma <sup>b</sup>                 | SSB          | 1                 | Al-Zalabani 2019   | 6,812/49,293 <sup>c</sup>   | OR <sup>d</sup>  | 1.26 [1.07-1.48]      | 7/0/1/6                     | random        | 65.9%; 0.012         | NA                   |
| ADHD                                | SSB          | 1                 | Farsad-Naeimi 2020 | NA/1,981 <sup>e</sup>       | OR <sup>d</sup>  | 1.80 [1.23-2.63]      | 2/0/0/2                     | fixed         | 51.1%; 0.153         | NA                   |
| BMD                                 | SSB          | 1                 | Ahn 2021           | NA/4,312 <sup>e</sup>       | SMD <sup>d</sup> | -0.66 [-1.01-(-0.31)] | 10/0/0/10                   | random        | 91%; < 0.01          | NA                   |
| Dental caries                       | SSB          | 1                 | Valenzuela 2021    | NA/17,892 <sup>e</sup>      | OR <sup>f</sup>  | 1.72 [1.41-2.09]      | 17/0/1/16                   | random        | 75.9%; < 0.001       | NA                   |
| Dental erosion                      | SSB          | 1                 | Valenzuela 2021    | NA/15,927 <sup>e</sup>      | OR <sup>f</sup>  | 1.77 [1.28-2.43]      | 13/0/0/13                   | random        | 90.9%; < 0.001       | NA                   |
| Depression                          | SSB          | 2                 | Hu 2019            | 37,131/620,411 <sup>c</sup> | RR <sup>d</sup>  | 1.31 [1.24-1.39]      | 10/0/4/6                    | random        | 29.2%; 0.176         | 0.726                |
| NAFLD                               | SSB          | 3                 | Chen 2019          | 1,326/9,705 <sup>c</sup>    | RR <sup>d</sup>  | 1.39 [1.29-1.50]      | 12/0/1/11                   | fixed         | 42%; 0.06            | NA                   |
| IHCL                                | Fructose     | 2                 | Chiu 2014          | NA/60 <sup>e</sup>          | SMD <sup>g</sup> | 0.45 [0.18-0.72]      | 5/5/0/0                     | random        | 55%; 0.07            | > 0.05               |
| ADHD                                | Total sugars | 1                 | Farsad-Naeimi 2020 | NA/25,945 <sup>c</sup>      | OR <sup>d</sup>  | 1.22 [1.04-1.42]      | 7/0/3/4                     | random        | 81.9%; < 0.001       | NA                   |
| <b>Non-significant associations</b> |              |                   |                    |                             |                  |                       |                             |               |                      |                      |
| CKD                                 | SSB          | 2                 | Lo 2021            | NA/25,455 <sup>c</sup>      | RR <sup>d</sup>  | 1.30 [0.88-1.94]      | 6/0/5/1                     | random        | 82.5%; < 0.001       | 0.259                |
| ALT                                 | Fructose     | 2                 | Chiu 2014          | NA/164 <sup>e</sup>         | WMD <sup>g</sup> | 0.15 [-1.51-1.82]     | 6/6/0/0                     | random        | 0%; 0.97             | > 0.05               |
| Asthma in offspring <sup>h</sup>    | Free sugars  | 1                 | Gupta 2021         | NA/20,048                   | OR <sup>d</sup>  | 1.07 [1.00-1.14]      | 2/0/2/0                     | random        | 0.0%; 0.387          | NA                   |

MA, meta-analysis; CI, confidence interval; T, total No. of studies; R, randomized controlled trial; C, cohort studies; P, population-based case-control and/or cross-sectional studies; SSB, sugar-sweetened beverage; HR, hazard ratio; NA, not available; OR, odds ratio; ADHD, Attention Deficit Hyperactivity Disorder; BMD, bone mineral density; SMD, standardized mean difference; RR, relative risk; NAFLD, non-alcoholic fatty liver disease; IHCL, intrahepatocellular lipids; CKD, chronic kidney disease; ALT, alanine aminotransferase; WMD, weighted mean difference.

<sup>a</sup> 250 mL/d increment.

<sup>b</sup> Children.

<sup>c</sup> Case-control/cross-sectional and cohort studies.

<sup>d</sup> Highest versus lowest.

<sup>e</sup> Case/control.

<sup>f</sup> Never/low versus moderate/high consumption.

<sup>g</sup> Any versus none.

<sup>h</sup> Maternal increased free sugar intake during pregnancy.

Supplementary Table E. Assessments of AMSTAR scores, GRADE classification and evidence classification.

| Outcome                                   | Category     | Study                      | Study design                                   | AMSTAR | GRADE    | Evidence class |
|-------------------------------------------|--------------|----------------------------|------------------------------------------------|--------|----------|----------------|
| <i>Endocrine &amp; metabolic outcomes</i> |              |                            |                                                |        |          |                |
| Δ Body weight                             | SSB          | Malik 2013                 | RCT                                            | 8      | moderate | IV             |
| Liver fat accumulation                    | Added sugars | Ma 2016                    | RCT                                            | 8      | moderate | IV             |
| Muscle fat accumulation                   | Added sugars | Ma 2016                    | RCT                                            | 8      | moderate | IV             |
| Serum uric acid                           | Fructose     | Wang 2012                  | RCT                                            | 9      | moderate | NS             |
| Obesity <sup>a</sup>                      | SSB          | Morenga 2013               | Cohort                                         | 9      | low      | II             |
| Gout (dose-response)                      | SSB          | Ayoub-Charette 2019        | Cohort                                         | 9      | low      | III            |
| Δ BMI <sup>a</sup>                        | SSB          | Malik 2013                 | Cohort                                         | 8      | low      | IV             |
| Δ Body weight                             | Fructose     | Sievenpiper 2012           | RCT                                            | 8      | low      | NS             |
| Gout                                      | SSB          | Ebrahimpour-koujan<br>2020 | Cohort                                         | 9      | very low | III            |
| Gout                                      | Fructose     | Jamnik 2016                | Cohort                                         | 9      | very low | III            |
| HDL-C                                     | SSB          | Nikniaz 2021               | Cohort, case-control<br>and/or cross-sectional | 10     | very low | III            |
| Hyperuricemia                             | SSB          | Ebrahimpour-koujan<br>2020 | Case-control and/or<br>cross-sectional         | 9      | very low | III            |
| Hyperuricemia                             | Fructose     | Li 2018                    | Case-control and/or<br>cross-sectional         | 8      | very low | II             |
| LADA                                      | SSB          | El-Malky 2020              | Case-control and/or<br>cross-sectional         | 7      | very low | III            |
| Large waist circumference                 | SSB          | Ardeshirlarijani 2021      | Cohort                                         | 9      | very low | NS             |
| LDL-C                                     | SSB          | Nikniaz 2021               | Cohort, case-control<br>and/or cross-sectional | 10     | very low | IV             |
| Metabolic syndrome                        | SSB          | Semnani-Azad 2020          | Cohort                                         | 10     | very low | IV             |

|                                       |              |                         |                                             |    |          |     |
|---------------------------------------|--------------|-------------------------|---------------------------------------------|----|----------|-----|
| Obesity                               | SSB          | Qin 2020                | Cohort                                      | 8  | very low | III |
| Postprandial TG                       | Fructose     | Wang 2014               | RCT                                         | 9  | very low | NS  |
| Serum uric acid                       | SSB          | Ebrahimpour-koujan 2021 | Case-control and/or cross-sectional         | 10 | very low | IV  |
| T2DM                                  | SSB          | Meng 2021               | Cohort                                      | 8  | very low | II  |
| T2DM                                  | Sucrose      | Tsilas 2017             | Cohort                                      | 10 | very low | IV  |
| T2DM                                  | Fructose     | Tsilas 2017             | Cohort                                      | 10 | very low | NS  |
| T2DM                                  | Total sugars | Tsilas 2017             | Cohort                                      | 10 | very low | NS  |
| TC                                    | SSB          | Nikniaz 2021            | Case-control and/or cross-sectional         | 10 | very low | IV  |
| TG                                    | SSB          | Nikniaz 2021            | Cohort, case-control and/or cross-sectional | 10 | very low | NS  |
| $\Delta$ BMI                          | SSB          | Mattes 2011             | RCT                                         | 8  | very low | NS  |
| $\Delta$ Body weight (one year)       | SSB          | Malik 2013              | Cohort                                      | 8  | very low | IV  |
| <b><i>Cardiovascular outcomes</i></b> |              |                         |                                             |    |          |     |
| CHD                                   | SSB          | Bechthold 2017          | Cohort                                      | 9  | low      | II  |
| MI                                    | SSB          | Narain 2016             | Cohort                                      | 8  | low      | III |
| Hypertension                          | Fructose     | Jayalath 2014           | Cohort                                      | 9  | low      | NS  |
| CVD                                   | SSB          | Yin 2021                | Cohort                                      | 9  | very low | IV  |
| CVD                                   | Sucrose      | Khan 2019               | Cohort                                      | 10 | very low | NS  |
| CVD                                   | Total sugars | Khan 2019               | Cohort                                      | 10 | very low | NS  |
| CVD mortality                         | SSB          | Zhang 2021              | Cohort                                      | 10 | very low | III |
| CVD mortality                         | Fructose     | Khan 2019               | Cohort                                      | 10 | very low | IV  |
| CVD mortality                         | Sucrose      | Khan 2019               | Cohort                                      | 10 | very low | IV  |
| CVD mortality                         | Total sugars | Khan 2019               | Cohort                                      | 10 | very low | IV  |
| CVD mortality                         | Added sugars | Khan 2019               | Cohort                                      | 10 | very low | NS  |

|                               |              |                |                                             |    |          |     |
|-------------------------------|--------------|----------------|---------------------------------------------|----|----------|-----|
| Heart failure                 | SSB          | Bechthold 2017 | Cohort                                      | 9  | very low | NS  |
| Hypertension                  | SSB          | Liu 2019       | Cohort                                      | 11 | very low | II  |
| Hypertension <sup>b</sup>     | SSB          | Farhangi 2020  | Case-control and/or cross-sectional         | 8  | very low | III |
| Stroke                        | SSB          | Bechthold 2017 | Cohort                                      | 9  | very low | IV  |
| Δ DBP <sup>b</sup>            | SSB          | Farhangi 2020  | Cohort, case-control and/or cross-sectional | 8  | very low | NS  |
| Δ SBP <sup>b</sup>            | SSB          | Farhangi 2020  | Cohort, case-control and/or cross-sectional | 8  | very low | III |
| <b><i>Cancer outcomes</i></b> |              |                |                                             |    |          |     |
| Pancreatic cancer             | Fructose     | Aune 2012      | Cohort                                      | 6  | low      | III |
| Hepatocellular carcinoma      | SSB          | Li 2021        | Cohort, case-control and/or cross-sectional | 8  | low      | IV  |
| Biliary track cancer          | SSB          | Li 2021        | Cohort                                      | 8  | very low | NS  |
| Bladder cancer                | SSB          | Li 2021        | Cohort, case-control and/or cross-sectional | 8  | very low | NS  |
| Breast cancer                 | SSB          | Llaha 2021     | Cohort, case-control and/or cross-sectional | 7  | very low | IV  |
| Breast cancer mortality       | SSB          | Li 2021        | Cohort                                      | 8  | very low | IV  |
| Colon cancer                  | SSB          | Zhang 2010     | Cohort                                      | 4  | very low | NS  |
| Colorectal cancer             | SSB          | Li 2021        | Cohort                                      | 8  | very low | NS  |
| Colorectal cancer             | Added sugars | Galeone 2012   | Cohort                                      | 3  | very low | NS  |
| Colorectal cancer mortality   | SSB          | Li 2021        | Cohort                                      | 8  | very low | NS  |
| Endometrial cancer            | SSB          | Li 2021        | Cohort                                      | 8  | very low | NS  |
| Esophageal cancer             | SSB          | Li 2021        | Cohort, case-control and/or cross-sectional | 8  | very low | NS  |



|                                  |              |                    |                                                |    |          |     |
|----------------------------------|--------------|--------------------|------------------------------------------------|----|----------|-----|
| Gastric cancer                   | SSB          | Li 2021            | Cohort                                         | 8  | very low | NS  |
| Glioma                           | SSB          | Li 2021            | Cohort                                         | 8  | very low | IV  |
| Hematologic malignancy           | SSB          | Li 2021            | Cohort                                         | 8  | very low | NS  |
| Kidney cancer                    | SSB          | Li 2021            | Cohort                                         | 8  | very low | NS  |
| Lung cancer mortality            | SSB          | Li 2021            | Cohort                                         | 8  | very low | NS  |
| Nasopharyngeal carcinoma         | SSB          | Li 2021            | Cohort, case-control<br>and/or cross-sectional | 8  | very low | NS  |
| Ovarian cancer                   | Lactose      | Liu 2015           | Cohort                                         | 5  | very low | NS  |
| Overall cancer mortality         | SSB          | Li 2021            | Cohort                                         | 8  | very low | IV  |
| Overall cancer risk              | SSB          | Li 2021            | Cohort                                         | 8  | very low | IV  |
| Pancreatic cancer                | SSB          | Li 2021            | Cohort                                         | 8  | very low | NS  |
| Pancreatic cancer                | Sucrose      | Aune 2012          | Cohort                                         | 6  | very low | NS  |
| Prostate cancer                  | SSB          | Li 2021            | Cohort                                         | 8  | very low | III |
| Prostate cancer mortality        | SSB          | Li 2021            | Cohort                                         | 8  | very low | NS  |
| <b><i>Other outcomes</i></b>     |              |                    |                                                |    |          |     |
| Depression                       | SSB          | Hu 2019            | Cohort, case-control<br>and/or cross-sectional | 9  | low      | II  |
| All-cause mortality              | SSB          | Pan 2021           | Cohort                                         | 10 | low      | III |
| ALT                              | Fructose     | Chiu 2014          | RCT                                            | 9  | low      | NS  |
| ADHD                             | SSB          | Farsad-Naeimi 2020 | Case-control<br>and/or cross-sectional         | 7  | very low | IV  |
| ADHD                             | Total sugars | Farsad-Naeimi 2020 | Cohort, case-control<br>and/or cross-sectional | 7  | very low | IV  |
| Asthma in offspring <sup>c</sup> | Free sugars  | Gupta 2021         | Cohort                                         | 8  | very low | NS  |
| Asthma <sup>a</sup>              | SSB          | Al-Zalabani 2019   | Cohort, case-control<br>and/or cross-sectional | 8  | very low | IV  |

|                |          |                 |                                                |    |          |     |
|----------------|----------|-----------------|------------------------------------------------|----|----------|-----|
| BMD            | SSB      | Ahn 2021        | Case-control<br>and/or cross-sectional         | 8  | very low | IV  |
| CKD            | SSB      | Lo 2021         | Cohort, case-control<br>and/or cross-sectional | 9  | very low | NS  |
| Dental caries  | SSB      | Valenzuela 2021 | Cohort, case-control<br>and/or cross-sectional | 10 | very low | II  |
| Dental erosion | SSB      | Valenzuela 2021 | Case-control<br>and/or cross-sectional         | 10 | very low | III |
| IHCL           | Fructose | Chiu 2014       | RCT                                            | 9  | very low | IV  |
| NAFLD          | SSB      | Chen 2019       | Cohort, case-control<br>and/or cross-sectional | 8  | very low | II  |

---

AMSTAR, a measurement tool to assess systematic reviews; GRADE, Grading of Recommendations Assessment, Development, and Evaluation;  $\Delta$ , final value – baseline value; SSB, sugar-sweetened beverage; RCT, randomized controlled trial; NS, non-significant; BMI, body mass index; HDL-C, high-density lipoprotein cholesterol; LADA, latent autoimmune diabetes in adults; LDL-C, low-density lipoprotein cholesterol; TG, triglycerides; T2DM, type 2 diabetes mellitus; TC, total cholesterol; CHD, coronary heart disease; MI, myocardial infarction; CVD, cardiovascular disease; DBP, diastolic blood pressure; SBP, systolic blood pressure; ALT, alanine aminotransferase; ADHD, Attention Deficit Hyperactivity Disorder; BMD, bone mineral density; CKD, chronic kidney disease; IHCL, intrahepatocellular lipids; NAFLD, non-alcoholic fatty liver disease.

<sup>a</sup> Children.

<sup>b</sup> Children and adolescence.

<sup>c</sup> Maternal increased free sugar intake during pregnancy.

Supplementary Table F. Assessments of AMSTAR scores.

| Outcome                          | Category     | Assessed with                              | Author             | Year | A priori design provided | Duplicate study selection & data extraction | At least two electronic databases searched | Status of publication used as an inclusion criterion | List of included and excluded studies provided | Characteristics of included studies provided | Scientific quality of included studies assessed | Scientific quality of the included studies used appropriately to form conclusions | Appropriate methods to combine studies | Publication bias assessed | Conflict of interest included | Total AMSTAR Score |
|----------------------------------|--------------|--------------------------------------------|--------------------|------|--------------------------|---------------------------------------------|--------------------------------------------|------------------------------------------------------|------------------------------------------------|----------------------------------------------|-------------------------------------------------|-----------------------------------------------------------------------------------|----------------------------------------|---------------------------|-------------------------------|--------------------|
| ADHD                             | SSB          | Highest versus lowest                      | Farsad-Naeimi      | 2020 | 0                        | 1                                           | 1                                          | 0                                                    | 1                                              | 1                                            | 1                                               | 0                                                                                 | 1                                      | 0                         | 1                             | 7                  |
| ADHD                             | Total sugars | Highest versus lowest                      | Farsad-Naeimi      | 2020 | 0                        | 1                                           | 1                                          | 0                                                    | 1                                              | 1                                            | 1                                               | 0                                                                                 | 1                                      | 0                         | 1                             | 7                  |
| All-cause mortality              | SSB          | 250 mL/d increment                         | Pan                | 2021 | 1                        | 1                                           | 1                                          | 0                                                    | 1                                              | 1                                            | 1                                               | 1                                                                                 | 1                                      | 1                         | 1                             | 10                 |
| ALT                              | Fructose     | Any versus none                            | Chiu               | 2014 | 1                        | 1                                           | 1                                          | 0                                                    | 1                                              | 1                                            | 1                                               | 0                                                                                 | 1                                      | 1                         | 1                             | 9                  |
| Asthma in offspring <sup>a</sup> | Free sugars  | Highest versus lowest                      | Gupta              | 2021 | 1                        | 1                                           | 1                                          | 0                                                    | 1                                              | 1                                            | 1                                               | 0                                                                                 | 1                                      | 0                         | 1                             | 8                  |
| Asthma <sup>b</sup>              | SSB          | Highest versus lowest                      | Al-Zalabani        | 2019 | 0                        | 1                                           | 1                                          | 0                                                    | 1                                              | 1                                            | 1                                               | 0                                                                                 | 1                                      | 1                         | 1                             | 8                  |
| Biliary track cancer             | SSB          | Highest versus lowest                      | Li                 | 2021 | 0                        | 1                                           | 1                                          | 0                                                    | 1                                              | 1                                            | 1                                               | 0                                                                                 | 1                                      | 1                         | 1                             | 8                  |
| Bladder cancer                   | SSB          | Highest versus lowest                      | Li                 | 2021 | 0                        | 1                                           | 1                                          | 0                                                    | 1                                              | 1                                            | 1                                               | 0                                                                                 | 1                                      | 1                         | 1                             | 8                  |
| BMD                              | SSB          | Highest versus lowest                      | Ahn                | 2021 | 1                        | 1                                           | 1                                          | 0                                                    | 1                                              | 1                                            | 1                                               | 0                                                                                 | 1                                      | 0                         | 1                             | 8                  |
| Breast cancer                    | SSB          | Highest versus lowest                      | Llaha              | 2021 | 0                        | 1                                           | 1                                          | 0                                                    | 1                                              | 1                                            | 1                                               | 0                                                                                 | 1                                      | 0                         | 1                             | 7                  |
| Breast cancer mortality          | SSB          | Highest versus lowest                      | Li                 | 2021 | 0                        | 1                                           | 1                                          | 0                                                    | 1                                              | 1                                            | 1                                               | 0                                                                                 | 1                                      | 1                         | 1                             | 8                  |
| CHD                              | SSB          | 250 mL/d increment                         | Bechthold          | 2017 | 1                        | 1                                           | 1                                          | 0                                                    | 1                                              | 1                                            | 0                                               | 1                                                                                 | 1                                      | 1                         | 1                             | 9                  |
| CKD                              | SSB          | Highest versus lowest                      | Lo                 | 2021 | 1                        | 1                                           | 1                                          | 0                                                    | 1                                              | 1                                            | 1                                               | 0                                                                                 | 1                                      | 1                         | 1                             | 9                  |
| Colon cancer                     | SSB          | 375 g/d increment                          | Zhang              | 2010 | 1                        | 0                                           | 0                                          | 0                                                    | 0                                              | 1                                            | 0                                               | 0                                                                                 | 1                                      | 0                         | 1                             | 4                  |
| Colorectal cancer                | SSB          | Highest versus lowest                      | Li                 | 2021 | 0                        | 1                                           | 1                                          | 0                                                    | 1                                              | 1                                            | 1                                               | 0                                                                                 | 1                                      | 1                         | 1                             | 8                  |
| Colorectal cancer                | Added sugars | Highest versus lowest                      | Galeone            | 2012 | 0                        | 0                                           | 0                                          | 0                                                    | 0                                              | 0                                            | 0                                               | 0                                                                                 | 1                                      | 1                         | 1                             | 3                  |
| Colorectal cancer mortality      | SSB          | Highest versus lowest                      | Li                 | 2021 | 0                        | 1                                           | 1                                          | 0                                                    | 1                                              | 1                                            | 1                                               | 0                                                                                 | 1                                      | 1                         | 1                             | 8                  |
| CVD                              | SSB          | 1 serving/d increment                      | Yin                | 2021 | 1                        | 1                                           | 1                                          | 0                                                    | 1                                              | 1                                            | 1                                               | 0                                                                                 | 1                                      | 1                         | 1                             | 9                  |
| CVD                              | Sucrose      | Highest versus lowest                      | Khan               | 2019 | 1                        | 1                                           | 1                                          | 0                                                    | 1                                              | 1                                            | 1                                               | 1                                                                                 | 1                                      | 1                         | 1                             | 10                 |
| CVD                              | Total sugars | Highest versus lowest                      | Khan               | 2019 | 1                        | 1                                           | 1                                          | 0                                                    | 1                                              | 1                                            | 1                                               | 1                                                                                 | 1                                      | 1                         | 1                             | 10                 |
| CVD mortality                    | SSB          | 1 serving/d increment                      | Zhang              | 2021 | 0                        | 1                                           | 1                                          | 1                                                    | 1                                              | 1                                            | 1                                               | 1                                                                                 | 1                                      | 1                         | 1                             | 10                 |
| CVD mortality                    | Fructose     | Highest versus lowest                      | Khan               | 2019 | 1                        | 1                                           | 1                                          | 0                                                    | 1                                              | 1                                            | 1                                               | 1                                                                                 | 1                                      | 1                         | 1                             | 10                 |
| CVD mortality                    | Sucrose      | Highest versus lowest                      | Khan               | 2019 | 1                        | 1                                           | 1                                          | 0                                                    | 1                                              | 1                                            | 1                                               | 1                                                                                 | 1                                      | 1                         | 1                             | 10                 |
| CVD mortality                    | Total sugars | Highest versus lowest                      | Khan               | 2019 | 1                        | 1                                           | 1                                          | 0                                                    | 1                                              | 1                                            | 1                                               | 1                                                                                 | 1                                      | 1                         | 1                             | 10                 |
| CVD mortality                    | Added sugars | Highest versus lowest                      | Khan               | 2019 | 1                        | 1                                           | 1                                          | 0                                                    | 1                                              | 1                                            | 1                                               | 1                                                                                 | 1                                      | 1                         | 1                             | 10                 |
| Dental caries                    | SSB          | Never/low versus moderate/high consumption | Valenzuela         | 2021 | 1                        | 1                                           | 1                                          | 0                                                    | 1                                              | 1                                            | 1                                               | 1                                                                                 | 1                                      | 1                         | 1                             | 10                 |
| Dental erosion                   | SSB          | Never/low versus moderate/high consumption | Valenzuela         | 2021 | 1                        | 1                                           | 1                                          | 0                                                    | 1                                              | 1                                            | 1                                               | 1                                                                                 | 1                                      | 1                         | 1                             | 10                 |
| Depression                       | SSB          | Highest versus lowest                      | Hu                 | 2019 | 0                        | 1                                           | 1                                          | 1                                                    | 1                                              | 1                                            | 1                                               | 0                                                                                 | 1                                      | 1                         | 1                             | 9                  |
| Endometrial cancer               | SSB          | Highest versus lowest                      | Li                 | 2021 | 0                        | 1                                           | 1                                          | 0                                                    | 1                                              | 1                                            | 1                                               | 0                                                                                 | 1                                      | 1                         | 1                             | 8                  |
| Esophageal cancer                | SSB          | Highest versus lowest                      | Li                 | 2021 | 0                        | 1                                           | 1                                          | 0                                                    | 1                                              | 1                                            | 1                                               | 0                                                                                 | 1                                      | 1                         | 1                             | 8                  |
| Gastric cancer                   | SSB          | Highest versus lowest                      | Li                 | 2021 | 0                        | 1                                           | 1                                          | 0                                                    | 1                                              | 1                                            | 1                                               | 0                                                                                 | 1                                      | 1                         | 1                             | 8                  |
| Glioma                           | SSB          | Highest versus lowest                      | Li                 | 2021 | 0                        | 1                                           | 1                                          | 0                                                    | 1                                              | 1                                            | 1                                               | 0                                                                                 | 1                                      | 1                         | 1                             | 8                  |
| Gout                             | SSB          | Highest versus lowest                      | Ebrahimpour-koujan | 2020 | 0                        | 1                                           | 1                                          | 1                                                    | 1                                              | 1                                            | 1                                               | 0                                                                                 | 1                                      | 1                         | 1                             | 9                  |
| Gout (dose-response)             | SSB          | 1 serving/week increment                   | Ayoub-Charette     | 2019 | 1                        | 1                                           | 1                                          | 0                                                    | 1                                              | 1                                            | 1                                               | 1                                                                                 | 1                                      | 0                         | 1                             | 9                  |
| Gout                             | Fructose     | Highest versus lowest                      | Jamnik             | 2016 | 1                        | 1                                           | 1                                          | 0                                                    | 1                                              | 1                                            | 1                                               | 1                                                                                 | 1                                      | 0                         | 1                             | 9                  |
| HDL-C                            | SSB          | Highest versus lowest                      | Nikniaz            | 2021 | 1                        | 1                                           | 1                                          | 0                                                    | 1                                              | 1                                            | 1                                               | 1                                                                                 | 1                                      | 1                         | 1                             | 10                 |
| Heart failure                    | SSB          | Highest versus lowest                      | Bechthold          | 2017 | 1                        | 1                                           | 1                                          | 0                                                    | 1                                              | 1                                            | 0                                               | 1                                                                                 | 1                                      | 1                         | 1                             | 9                  |
| Hematologic malignancy           | SSB          | Highest versus lowest                      | Li                 | 2021 | 0                        | 1                                           | 1                                          | 0                                                    | 1                                              | 1                                            | 1                                               | 0                                                                                 | 1                                      | 1                         | 1                             | 8                  |
| Hepatocellular carcinoma         | SSB          | Highest versus lowest                      | Li                 | 2021 | 0                        | 1                                           | 1                                          | 0                                                    | 1                                              | 1                                            | 1                                               | 0                                                                                 | 1                                      | 1                         | 1                             | 8                  |
| Hypertension                     | SSB          | Highest versus lowest                      | Liu                | 2019 | 1                        | 1                                           | 1                                          | 1                                                    | 1                                              | 1                                            | 1                                               | 1                                                                                 | 1                                      | 1                         | 1                             | 11                 |
| Hypertension                     | Fructose     | Highest versus lowest                      | Jayalath           | 2014 | 1                        | 1                                           | 1                                          | 0                                                    | 1                                              | 1                                            | 1                                               | 0                                                                                 | 1                                      | 1                         | 1                             | 9                  |
| Hypertension <sup>c</sup>        | SSB          | Highest versus lowest                      | Farhangi           | 2020 | 0                        | 1                                           | 1                                          | 0                                                    | 1                                              | 1                                            | 1                                               | 0                                                                                 | 1                                      | 1                         | 1                             | 8                  |
| Hyperuricemia                    | SSB          | Highest versus lowest                      | Ebrahimpour-koujan | 2020 | 0                        | 1                                           | 1                                          | 1                                                    | 1                                              | 1                                            | 1                                               | 0                                                                                 | 1                                      | 1                         | 1                             | 9                  |
| Hyperuricemia                    | Fructose     | Highest versus lowest                      | Li                 | 2018 | 0                        | 1                                           | 1                                          | 0                                                    | 1                                              | 1                                            | 1                                               | 0                                                                                 | 1                                      | 1                         | 1                             | 8                  |
| IHCL                             | Fructose     | Any versus none                            | Chiu               | 2014 | 1                        | 1                                           | 1                                          | 0                                                    | 1                                              | 1                                            | 1                                               | 0                                                                                 | 1                                      | 1                         | 1                             | 9                  |

|                           |              |                                                 |                        |      |   |   |   |   |   |   |   |   |   |   |   |    |
|---------------------------|--------------|-------------------------------------------------|------------------------|------|---|---|---|---|---|---|---|---|---|---|---|----|
| Kidney cancer             | SSB          | Highest versus lowest                           | Li                     | 2021 | 0 | 1 | 1 | 0 | 1 | 1 | 1 | 0 | 1 | 1 | 1 | 8  |
| LADA                      | SSB          | Highest versus lowest                           | El-Malky               | 2020 | 0 | 1 | 1 | 1 | 0 | 1 | 0 | 0 | 1 | 1 | 1 | 7  |
| Large waist circumference | SSB          | Highest versus lowest                           | Ardeshirlarijani       | 2021 | 1 | 1 | 1 | 0 | 1 | 1 | 1 | 0 | 1 | 1 | 1 | 9  |
| LDL-C                     | SSB          | Highest versus lowest                           | Nikniaz                | 2021 | 1 | 1 | 1 | 0 | 1 | 1 | 1 | 1 | 1 | 1 | 1 | 10 |
| Liver fat accumulation    | Added sugars | Any versus none                                 | Ma                     | 2016 | 0 | 1 | 1 | 0 | 1 | 1 | 1 | 0 | 1 | 1 | 1 | 8  |
| Lung cancer mortality     | SSB          | Highest versus lowest                           | Li                     | 2021 | 0 | 1 | 1 | 0 | 1 | 1 | 1 | 0 | 1 | 1 | 1 | 8  |
| Metabolic syndrome        | SSB          | 355 mL/d increment                              | Semnani-Azad           | 2020 | 0 | 1 | 1 | 1 | 1 | 1 | 1 | 1 | 1 | 1 | 1 | 10 |
| MI                        | SSB          | Highest versus lowest                           | Narain                 | 2016 | 0 | 1 | 1 | 0 | 1 | 1 | 1 | 0 | 1 | 1 | 1 | 8  |
| Muscle fat accumulation   | Added sugars | Any versus none                                 | Ma                     | 2016 | 0 | 1 | 1 | 0 | 1 | 1 | 1 | 0 | 1 | 1 | 1 | 8  |
| NAFLD                     | SSB          | Highest versus lowest                           | Chen                   | 2019 | 0 | 1 | 1 | 0 | 1 | 1 | 1 | 0 | 1 | 1 | 1 | 8  |
| Nasopharyngeal carcinoma  | SSB          | Highest versus lowest                           | Li                     | 2021 | 0 | 1 | 1 | 0 | 1 | 1 | 1 | 0 | 1 | 1 | 1 | 8  |
| Obesity                   | SSB          | 250 mL/d increment                              | Qin                    | 2020 | 0 | 1 | 1 | 0 | 1 | 1 | 1 | 0 | 1 | 1 | 1 | 8  |
| Obesity <sup>b</sup>      | SSB          | Any versus none                                 | Morenga                | 2013 | 0 | 1 | 1 | 0 | 1 | 1 | 1 | 1 | 1 | 1 | 1 | 9  |
| Ovarian cancer            | Lactose      | Highest versus lowest                           | Liu                    | 2015 | 0 | 0 | 1 | 0 | 0 | 1 | 0 | 0 | 1 | 1 | 1 | 5  |
| Overall cancer mortality  | SSB          | Highest versus lowest                           | Li                     | 2021 | 0 | 1 | 1 | 0 | 1 | 1 | 1 | 0 | 1 | 1 | 1 | 8  |
| Overall cancer risk       | SSB          | 1 serving/d increment                           | Li                     | 2021 | 0 | 1 | 1 | 0 | 1 | 1 | 1 | 0 | 1 | 1 | 1 | 8  |
| Pancreatic cancer         | Fructose     | 25 g/d increment                                | Aune                   | 2012 | 0 | 1 | 1 | 0 | 0 | 1 | 0 | 0 | 1 | 1 | 1 | 6  |
| Pancreatic cancer         | SSB          | Highest versus lowest                           | Li                     | 2021 | 0 | 1 | 1 | 0 | 1 | 1 | 1 | 0 | 1 | 1 | 1 | 8  |
| Pancreatic cancer         | Sucrose      | 25 g/d increment                                | Aune                   | 2012 | 0 | 1 | 1 | 0 | 0 | 1 | 0 | 0 | 1 | 1 | 1 | 6  |
| Postprandial TG           | Fructose     | Any versus none                                 | Wang                   | 2014 | 1 | 1 | 1 | 0 | 1 | 1 | 1 | 0 | 1 | 1 | 1 | 9  |
| Prostate cancer           | SSB          | Highest versus lowest                           | Li                     | 2021 | 0 | 1 | 1 | 0 | 1 | 1 | 1 | 0 | 1 | 1 | 1 | 8  |
| Prostate cancer mortality | SSB          | Highest versus lowest                           | Li                     | 2021 | 0 | 1 | 1 | 0 | 1 | 1 | 1 | 0 | 1 | 1 | 1 | 8  |
| Serum uric acid           | SSB          | Highest versus lowest                           | Ebrahimpour-ko<br>ujan | 2021 | 1 | 1 | 1 | 1 | 1 | 1 | 1 | 0 | 1 | 1 | 1 | 10 |
| Serum uric acid           | Fructose     | Any versus none                                 | Wang                   | 2012 | 1 | 1 | 1 | 0 | 1 | 1 | 1 | 0 | 1 | 1 | 1 | 9  |
| Stroke                    | SSB          | 250 mL/d increment                              | Bechthold              | 2017 | 1 | 1 | 1 | 0 | 1 | 1 | 0 | 1 | 1 | 1 | 1 | 9  |
| T2DM                      | SSB          | 1 serving/d increment                           | Meng                   | 2021 | 0 | 1 | 1 | 0 | 1 | 1 | 1 | 0 | 1 | 1 | 1 | 8  |
| T2DM                      | Sucrose      | 25 g/d increment                                | Tsilas                 | 2017 | 1 | 1 | 1 | 0 | 1 | 1 | 1 | 1 | 1 | 1 | 1 | 10 |
| T2DM                      | Fructose     | Highest versus lowest                           | Tsilas                 | 2017 | 1 | 1 | 1 | 0 | 1 | 1 | 1 | 1 | 1 | 1 | 1 | 10 |
| T2DM                      | Total sugars | Highest versus lowest                           | Tsilas                 | 2017 | 1 | 1 | 1 | 0 | 1 | 1 | 1 | 1 | 1 | 1 | 1 | 10 |
| TC                        | SSB          | Highest versus lowest                           | Nikniaz                | 2021 | 1 | 1 | 1 | 0 | 1 | 1 | 1 | 1 | 1 | 1 | 1 | 10 |
| TG                        | SSB          | Highest versus lowest                           | Nikniaz                | 2021 | 1 | 1 | 1 | 0 | 1 | 1 | 1 | 1 | 1 | 1 | 1 | 10 |
| Δ BMI                     | SSB          | Reducing SSB consumption<br>versus not reducing | Mattes                 | 2011 | 0 | 1 | 1 | 1 | 1 | 1 | 1 | 0 | 1 | 0 | 1 | 8  |
| Δ BMI <sup>b</sup>        | SSB          | 1 serving/d increment                           | Malik                  | 2013 | 0 | 1 | 1 | 0 | 1 | 1 | 1 | 0 | 1 | 1 | 1 | 8  |
| Δ Body weight             | SSB          | Highest versus lowest                           | Malik                  | 2013 | 0 | 1 | 1 | 0 | 1 | 1 | 1 | 0 | 1 | 1 | 1 | 8  |
| Δ Body weight             | Fructose     | Any versus none                                 | Sievenpiper            | 2012 | 0 | 1 | 1 | 0 | 1 | 1 | 1 | 0 | 1 | 1 | 1 | 8  |
| Δ Body weight (one year)  | SSB          | 1 serving/d increment                           | Malik                  | 2013 | 0 | 1 | 1 | 0 | 1 | 1 | 1 | 0 | 1 | 1 | 1 | 8  |
| Δ DBP <sup>c</sup>        | SSB          | Highest versus lowest                           | Farhangi               | 2020 | 0 | 1 | 1 | 0 | 1 | 1 | 1 | 0 | 1 | 1 | 1 | 8  |
| Δ SBP <sup>c</sup>        | SSB          | Highest versus lowest                           | Farhangi               | 2020 | 0 | 1 | 1 | 0 | 1 | 1 | 1 | 0 | 1 | 1 | 1 | 8  |

AMSTAR, a measurement tool to assess systematic reviews; ADHD, Attention Deficit Hyperactivity Disorder; SSB, sugar-sweetened beverage; ALT, alanine aminotransferase; BMD, bone mineral density; CHD, coronary heart disease; CKD, chronic kidney disease; CVD, cardiovascular disease; HDL-C, high-density lipoprotein cholesterol; IHCL, intrahepatocellular lipids; LADA, latent autoimmune diabetes in adults; LDL-C, low-density lipoprotein cholesterol; MI, myocardial infarction; NAFLD, non-alcoholic fatty liver disease; TG, triglycerides; T2DM, type 2 diabetes mellitus; TC, total cholesterol; Δ, final value – baseline value; BMI, body mass index; DBP, diastolic blood pressure; SBP, systolic blood pressure.

<sup>a</sup> Maternal increased free sugar intake during pregnancy.

<sup>b</sup> Children.

<sup>c</sup> Children and adolescence.

**Supplementary Table G.** GRADE classification of quality of evidence.

| Outcome                          | Category     | Assessed with         | Author        | Year | No. of studies | RCT | Cohort | Case-control/<br>cross-sectional | Risk of bias    | Inconsistency            | Indirectness            | Imprecision            | Publication bias   | Plausible confounding   | Magnitude of effect | Dose-response gradient | Quality  |
|----------------------------------|--------------|-----------------------|---------------|------|----------------|-----|--------|----------------------------------|-----------------|--------------------------|-------------------------|------------------------|--------------------|-------------------------|---------------------|------------------------|----------|
| ADHD                             | SSB          | Highest versus lowest | Farsad-Naeimi | 2020 | 2              | 0   | 0      | 2                                | serious risk    | no serious inconsistency | no serious indirectness | no serious imprecision | NA                 | would not reduce effect | no                  | no                     | very low |
| ADHD                             | Total sugars | Highest versus lowest | Farsad-Naeimi | 2020 | 7              | 0   | 3      | 4                                | serious risk    | serious inconsistency    | serious indirectness    | no serious imprecision | NA                 | would not reduce effect | no                  | no                     | very low |
| All-cause mortality              | SSB          | 250 mL/d increment    | Pan           | 2021 | 11             | 0   | 11     | 0                                | no serious risk | serious inconsistency    | no serious indirectness | no serious imprecision | undetected         | would not reduce effect | no                  | yes                    | low      |
| ALT                              | Fructose     | Any versus none       | Chiu          | 2014 | 6              | 6   | 0      | 0                                | no serious risk | no serious inconsistency | serious indirectness    | serious imprecision    | undetected         | would not reduce effect | no                  | no                     | low      |
| Asthma in offspring <sup>a</sup> | Free sugars  | Highest versus lowest | Gupta         | 2021 | 2              | 0   | 2      | 0                                | serious risk    | no serious inconsistency | serious indirectness    | no serious imprecision | NA                 | would not reduce effect | no                  | no                     | very low |
| Asthma <sup>b</sup>              | SSB          | Highest versus lowest | Al-Zalabani   | 2019 | 7              | 0   | 1      | 6                                | serious risk    | serious inconsistency    | no serious indirectness | serious imprecision    | undetected         | would not reduce effect | no                  | no                     | very low |
| Biliary track cancer             | SSB          | Highest versus lowest | Li            | 2021 | 2              | 0   | 2      | 0                                | serious risk    | serious inconsistency    | no serious indirectness | no serious imprecision | NA                 | would not reduce effect | no                  | no                     | very low |
| Bladder cancer                   | SSB          | Highest versus lowest | Li            | 2021 | 6              | 0   | 1      | 5                                | serious risk    | no serious inconsistency | no serious indirectness | serious imprecision    | NA                 | would not reduce effect | no                  | no                     | very low |
| BMD                              | SSB          | Highest versus lowest | Ahn           | 2021 | 10             | 0   | 0      | 10                               | serious risk    | serious inconsistency    | no serious indirectness | no serious imprecision | NA                 | would reduce effect     | no                  | no                     | very low |
| Breast cancer                    | SSB          | Highest versus lowest | Llaha         | 2021 | 6              | 0   | 4      | 2                                | serious risk    | no serious inconsistency | no serious indirectness | serious imprecision    | NA                 | would not reduce effect | no                  | no                     | very low |
| Breast cancer mortality          | SSB          | Highest versus lowest | Li            | 2021 | 2              | 0   | 2      | 0                                | serious risk    | no serious inconsistency | no serious indirectness | no serious imprecision | NA                 | would not reduce effect | no                  | no                     | very low |
| CHD                              | SSB          | 250 mL/d increment    | Bechthold     | 2017 | 4              | 0   | 4      | 0                                | serious risk    | no serious inconsistency | no serious indirectness | no serious imprecision | NA                 | would not reduce effect | no                  | yes                    | low      |
| CKD                              | SSB          | Highest versus lowest | Lo            | 2021 | 6              | 0   | 5      | 1                                | serious risk    | serious inconsistency    | no serious indirectness | serious imprecision    | undetected         | would not reduce effect | no                  | no                     | very low |
| Colon cancer                     | SSB          | 375 g/d increment     | Zhang         | 2010 | 13             | 0   | 13     | 0                                | serious risk    | no serious inconsistency | no serious indirectness | no serious imprecision | NA                 | would not reduce effect | no                  | no                     | very low |
| Colorectal cancer                | SSB          | Highest versus lowest | Li            | 2021 | 6              | 0   | 6      | 0                                | serious risk    | no serious inconsistency | no serious indirectness | serious imprecision    | NA                 | would not reduce effect | no                  | no                     | very low |
| Colorectal cancer                | Added sugars | Highest versus lowest | Galeone       | 2012 | 2              | 0   | 2      | 0                                | serious risk    | no serious inconsistency | serious indirectness    | no serious imprecision | NA                 | would not reduce effect | no                  | no                     | very low |
| Colorectal cancer mortality      | SSB          | Highest versus lowest | Li            | 2021 | 6              | 0   | 6      | 0                                | serious risk    | serious inconsistency    | no serious indirectness | serious imprecision    | NA                 | would not reduce effect | no                  | no                     | very low |
| CVD                              | SSB          | 1 serving/d increment | Yin           | 2021 | 7              | 0   | 7      | 7                                | no serious risk | serious inconsistency    | no serious indirectness | serious imprecision    | undetected         | would not reduce effect | no                  | yes                    | very low |
| CVD                              | Sucrose      | Highest versus lowest | Khan          | 2019 | 3              | 0   | 3      | 0                                | no serious risk | no serious inconsistency | serious indirectness    | no serious imprecision | NA                 | would not reduce effect | no                  | no                     | very low |
| CVD                              | Total sugars | Highest versus lowest | Khan          | 2019 | 8              | 0   | 8      | 0                                | no serious risk | no serious inconsistency | serious indirectness    | no serious imprecision | NA                 | would not reduce effect | no                  | no                     | very low |
| CVD mortality                    | SSB          | 1 serving/d increment | Zhang         | 2021 | 13             | 0   | 13     | 0                                | no serious risk | no serious inconsistency | no serious indirectness | serious imprecision    | strongly suspected | would not reduce effect | no                  | yes                    | very low |
| CVD mortality                    | Fructose     | Highest versus lowest | Khan          | 2019 | 2              | 0   | 2      | 0                                | no serious risk | no serious inconsistency | serious indirectness    | serious imprecision    | NA                 | would not reduce effect | no                  | yes                    | very low |
| CVD mortality                    | Sucrose      | Highest versus lowest | Khan          | 2019 | 2              | 0   | 2      | 0                                | no serious risk | no serious inconsistency | serious indirectness    | serious imprecision    | NA                 | would not reduce effect | no                  | yes                    | very low |
| CVD mortality                    | Total sugars | Highest versus lowest | Khan          | 2019 | 4              | 0   | 4      | 0                                | no serious risk | no serious inconsistency | serious indirectness    | serious imprecision    | NA                 | would not reduce effect | no                  | yes                    | very low |
| CVD mortality                    | Added sugars | Highest versus lowest | Khan          | 2019 | 4              | 0   | 4      | 0                                | no serious risk | serious inconsistency    | serious indirectness    | serious imprecision    | NA                 | would not reduce effect | no                  | yes                    | very low |
| Dental caries                    | SSB          | Never/low versus      | Valenzuela    | 2021 | 17             | 0   | 1      | 16                               | serious risk    | serious                  | no serious              | no serious             | undetected         | would not               | no                  | yes                    | very low |

|                           |              |                                            |                    |      |    |   |    |    |                 |                          |                         |                        |                    |                         |               |     |          |  |
|---------------------------|--------------|--------------------------------------------|--------------------|------|----|---|----|----|-----------------|--------------------------|-------------------------|------------------------|--------------------|-------------------------|---------------|-----|----------|--|
|                           |              | moderate/high consumption                  |                    |      |    |   |    |    |                 |                          | inconsistency           | indirectness           | imprecision        |                         | reduce effect |     |          |  |
| Dental erosion            | SSB          | Never/low versus moderate/high consumption | Valenzuela         | 2021 | 13 | 0 | 0  | 13 | no serious risk | serious inconsistency    | no serious indirectness | no serious imprecision | undetected         | would not reduce effect | no            | no  | very low |  |
| Depression                | SSB          | Highest versus lowest                      | Hu                 | 2019 | 10 | 0 | 4  | 6  | serious risk    | no serious inconsistency | no serious indirectness | no serious imprecision | undetected         | would not reduce effect | no            | yes | low      |  |
| Endometrial cancer        | SSB          | Highest versus lowest                      | Li                 | 2021 | 2  | 0 | 2  | 0  | serious risk    | serious inconsistency    | no serious indirectness | serious imprecision    | NA                 | would not reduce effect | no            | no  | very low |  |
| Esophageal cancer         | SSB          | Highest versus lowest                      | Li                 | 2021 | 5  | 0 | 1  | 4  | serious risk    | serious inconsistency    | no serious indirectness | serious imprecision    | NA                 | would not reduce effect | no            | no  | very low |  |
| Gastric cancer            | SSB          | Highest versus lowest                      | Li                 | 2021 | 2  | 0 | 2  | 0  | serious risk    | no serious inconsistency | no serious indirectness | serious imprecision    | NA                 | would not reduce effect | no            | no  | very low |  |
| Glioma                    | SSB          | Highest versus lowest                      | Li                 | 2021 | 2  | 0 | 2  | 0  | serious risk    | no serious inconsistency | no serious indirectness | serious imprecision    | NA                 | would not reduce effect | no            | no  | very low |  |
| Gout                      | SSB          | Highest versus lowest                      | Ebrahimpour-koujan | 2020 | 3  | 0 | 3  | 0  | serious risk    | no serious inconsistency | no serious indirectness | no serious imprecision | undetected         | would not reduce effect | no            | no  | very low |  |
| Gout (dose-response)      | SSB          | 1 serving/week increment                   | Ayoub-Charette     | 2019 | 2  | 0 | 2  | 0  | no serious risk | no serious inconsistency | serious indirectness    | no serious imprecision | undetected         | would not reduce effect | no            | yes | low      |  |
| Gout                      | Fructose     | Highest versus lowest                      | Jamnik             | 2016 | 2  | 0 | 2  | 0  | no serious risk | no serious inconsistency | serious indirectness    | no serious imprecision | NA                 | would not reduce effect | no            | no  | very low |  |
| HDL-C                     | SSB          | Highest versus lowest                      | Nikniaz            | 2021 | 14 | 0 | 1  | 13 | serious risk    | serious inconsistency    | no serious indirectness | serious imprecision    | undetected         | would not reduce effect | no            | no  | very low |  |
| Heart failure             | SSB          | Highest versus lowest                      | Bechthold          | 2017 | 2  | 0 | 2  | 0  | serious risk    | serious inconsistency    | no serious indirectness | serious imprecision    | NA                 | would not reduce effect | no            | yes | very low |  |
| Hematologic malignancy    | SSB          | Highest versus lowest                      | Li                 | 2021 | 2  | 0 | 2  | 0  | serious risk    | no serious inconsistency | no serious indirectness | serious imprecision    | NA                 | would not reduce effect | no            | no  | very low |  |
| Hepatocellular carcinoma  | SSB          | Highest versus lowest                      | Li                 | 2021 | 2  | 0 | 1  | 1  | serious risk    | no serious inconsistency | no serious indirectness | no serious imprecision | NA                 | would not reduce effect | yes           | no  | low      |  |
| Hypertension              | SSB          | Highest versus lowest                      | Liu                | 2019 | 13 | 0 | 13 | 0  | no serious risk | serious inconsistency    | no serious indirectness | serious imprecision    | strongly suspected | would not reduce effect | no            | yes | very low |  |
| Hypertension              | Fructose     | Highest versus lowest                      | Jayalath           | 2014 | 3  | 0 | 3  | 0  | no serious risk | no serious inconsistency | serious indirectness    | no serious imprecision | undetected         | would not reduce effect | no            | yes | low      |  |
| Hypertension <sup>c</sup> | SSB          | Highest versus lowest                      | Farhangi           | 2020 | 5  | 0 | 0  | 5  | no serious risk | no serious inconsistency | no serious indirectness | serious imprecision    | undetected         | would not reduce effect | no            | no  | very low |  |
| Hyperuricemia             | SSB          | Highest versus lowest                      | Ebrahimpour-koujan | 2020 | 6  | 0 | 0  | 6  | serious risk    | no serious inconsistency | no serious indirectness | no serious imprecision | undetected         | would not reduce effect | no            | no  | very low |  |
| Hyperuricemia             | Fructose     | Highest versus lowest                      | Li                 | 2018 | 4  | 0 | 0  | 4  | no serious risk | no serious inconsistency | serious indirectness    | no serious imprecision | undetected         | would not reduce effect | no            | no  | very low |  |
| IHCL                      | Fructose     | Any versus none                            | Chiu               | 2014 | 5  | 5 | 0  | 0  | serious risk    | serious inconsistency    | no serious indirectness | serious imprecision    | undetected         | would not reduce effect | no            | no  | very low |  |
| Kidney cancer             | SSB          | Highest versus lowest                      | Li                 | 2021 | 2  | 0 | 2  | 0  | serious risk    | no serious inconsistency | no serious indirectness | serious imprecision    | NA                 | would not reduce effect | no            | no  | very low |  |
| LADA                      | SSB          | Highest versus lowest                      | El-Malky           | 2020 | 6  | 0 | 0  | 6  | serious risk    | serious inconsistency    | no serious indirectness | serious imprecision    | undetected         | would not reduce effect | no            | no  | very low |  |
| Large waist circumference | SSB          | Highest versus lowest                      | Ardeshirlarijani   | 2021 | 10 | 0 | 10 | 0  | no serious risk | serious inconsistency    | no serious indirectness | serious imprecision    | NA                 | would not reduce effect | no            | no  | very low |  |
| LDL-C                     | SSB          | Highest versus lowest                      | Nikniaz            | 2021 | 9  | 0 | 1  | 8  | serious risk    | serious inconsistency    | no serious indirectness | no serious imprecision | undetected         | would not reduce effect | no            | yes | very low |  |
| Liver fat accumulation    | Added sugars | Any versus none                            | Ma                 | 2016 | 8  | 8 | 0  | 0  | no serious risk | no serious inconsistency | no serious indirectness | serious imprecision    | undetected         | would not reduce effect | no            | no  | moderate |  |
| Lung cancer mortality     | SSB          | Highest versus lowest                      | Li                 | 2021 | 2  | 0 | 2  | 0  | serious risk    | no serious inconsistency | no serious indirectness | no serious imprecision | NA                 | would not reduce effect | no            | no  | very low |  |
| Metabolic syndrome        | SSB          | 355 mL/d increment                         | Semnani-Azad       | 2020 | 6  | 0 | 6  | 0  | no serious risk | serious inconsistency    | no serious indirectness | serious imprecision    | NA                 | would not reduce effect | no            | yes | very low |  |
| MI                        | SSB          | Highest versus lowest                      | Narain             | 2016 | 4  | 0 | 4  | 0  | no serious risk | no serious inconsistency | no serious indirectness | no serious imprecision | NA                 | would not reduce effect | no            | no  | low      |  |

|                           |              |                                              |                    |      |    |    |    |    |                 |                          |                         |                        |                    |                         |    |     |          |  |
|---------------------------|--------------|----------------------------------------------|--------------------|------|----|----|----|----|-----------------|--------------------------|-------------------------|------------------------|--------------------|-------------------------|----|-----|----------|--|
|                           |              |                                              |                    |      |    |    |    |    | risk            | inconsistency            | indirectness            | imprecision            |                    | reduce effect           |    |     |          |  |
| Muscle fat accumulation   | Added sugars | Any versus none                              | Ma                 | 2016 | 5  | 5  | 0  | 0  | no serious risk | no serious inconsistency | no serious indirectness | serious imprecision    | undetected         | would not reduce effect | no | no  | moderate |  |
| NAFLD                     | SSB          | Highest versus lowest                        | Chen               | 2019 | 12 | 0  | 1  | 11 | serious risk    | serious inconsistency    | no serious indirectness | no serious imprecision | strongly suspected | would not reduce effect | no | yes | very low |  |
| Nasopharyngeal carcinoma  | SSB          | Highest versus lowest                        | Li                 | 2021 | 2  | 0  | 1  | 1  | serious risk    | no serious inconsistency | no serious indirectness | serious imprecision    | NA                 | would not reduce effect | no | no  | very low |  |
| Obesity                   | SSB          | 250 mL/d increment                           | Qin                | 2020 | 7  | 0  | 7  | 0  | no serious risk | serious inconsistency    | no serious indirectness | serious imprecision    | strongly suspected | would not reduce effect | no | yes | very low |  |
| Obesity <sup>b</sup>      | SSB          | Any versus none                              | Morenga            | 2013 | 7  | 0  | 7  | 0  | no serious risk | no serious inconsistency | no serious indirectness | no serious imprecision | NA                 | would not reduce effect | no | no  | low      |  |
| Ovarian cancer            | Lactose      | Highest versus lowest                        | Liu                | 2015 | 14 | 0  | 14 | 0  | serious risk    | no serious inconsistency | serious indirectness    | serious imprecision    | undetected         | would not reduce effect | no | no  | very low |  |
| Overall cancer mortality  | SSB          | Highest versus lowest                        | Li                 | 2021 | 10 | 0  | 10 | 0  | serious risk    | serious inconsistency    | no serious indirectness | no serious imprecision | undetected         | would not reduce effect | no | no  | very low |  |
| Overall cancer risk       | SSB          | 1 serving/d increment                        | Li                 | 2021 | 20 | 0  | 20 | 0  | serious risk    | serious inconsistency    | no serious indirectness | no serious imprecision | strongly suspected | would not reduce effect | no | yes | very low |  |
| Pancreatic cancer         | Fructose     | 25 g/d increment                             | Aune               | 2012 | 6  | 0  | 6  | 0  | serious risk    | no serious inconsistency | serious indirectness    | no serious imprecision | undetected         | would reduce effect     | no | yes | low      |  |
| Pancreatic cancer         | SSB          | Highest versus lowest                        | Li                 | 2021 | 6  | 0  | 6  | 0  | serious risk    | serious inconsistency    | no serious indirectness | serious imprecision    | NA                 | would not reduce effect | no | no  | very low |  |
| Pancreatic cancer         | Sucrose      | 25 g/d increment                             | Aune               | 2012 | 8  | 0  | 8  | 0  | serious risk    | serious inconsistency    | serious indirectness    | no serious imprecision | undetected         | would not reduce effect | no | no  | very low |  |
| Postprandial TG           | Fructose     | Any versus none                              | Wang               | 2014 | 5  | 5  | 0  | 0  | serious risk    | serious inconsistency    | no serious indirectness | serious imprecision    | undetected         | would not reduce effect | no | no  | very low |  |
| Prostate cancer           | SSB          | Highest versus lowest                        | Li                 | 2021 | 6  | 0  | 6  | 0  | serious risk    | no serious inconsistency | no serious indirectness | serious imprecision    | NA                 | would not reduce effect | no | no  | very low |  |
| Prostate cancer mortality | SSB          | Highest versus lowest                        | Li                 | 2021 | 2  | 0  | 2  | 0  | serious risk    | no serious inconsistency | no serious indirectness | no serious imprecision | NA                 | would not reduce effect | no | no  | very low |  |
| Serum uric acid           | SSB          | Highest versus lowest                        | Ebrahimpour-koujan | 2021 | 6  | 0  | 0  | 6  | serious risk    | no serious inconsistency | no serious indirectness | no serious imprecision | undetected         | would not reduce effect | no | no  | very low |  |
| Serum uric acid           | Fructose     | Any versus none                              | Wang               | 2012 | 9  | 9  | 0  | 0  | no serious risk | no serious inconsistency | no serious indirectness | serious imprecision    | undetected         | would not reduce effect | no | no  | moderate |  |
| Stroke                    | SSB          | 250 mL/d increment                           | Bechthold          | 2017 | 6  | 0  | 6  | 0  | serious risk    | no serious inconsistency | no serious indirectness | serious imprecision    | NA                 | would not reduce effect | no | yes | very low |  |
| T2DM                      | SSB          | 1 serving/d increment                        | Meng               | 2021 | 16 | 0  | 16 | 0  | no serious risk | serious inconsistency    | no serious indirectness | no serious imprecision | strongly suspected | would not reduce effect | no | yes | very low |  |
| T2DM                      | Sucrose      | 25 g/d increment                             | Tsilas             | 2017 | 6  | 0  | 6  | 0  | no serious risk | no serious inconsistency | serious indirectness    | serious imprecision    | NA                 | would not reduce effect | no | yes | very low |  |
| T2DM                      | Fructose     | Highest versus lowest                        | Tsilas             | 2017 | 6  | 0  | 6  | 0  | no serious risk | serious inconsistency    | serious indirectness    | serious imprecision    | NA                 | would not reduce effect | no | no  | very low |  |
| T2DM                      | Total sugars | Highest versus lowest                        | Tsilas             | 2017 | 12 | 0  | 12 | 0  | no serious risk | serious inconsistency    | serious indirectness    | no serious imprecision | undetected         | would not reduce effect | no | no  | very low |  |
| TC                        | SSB          | Highest versus lowest                        | Nikniaz            | 2021 | 7  | 0  | 0  | 7  | serious risk    | serious inconsistency    | no serious indirectness | no serious imprecision | undetected         | would not reduce effect | no | yes | very low |  |
| TG                        | SSB          | Highest versus lowest                        | Nikniaz            | 2021 | 13 | 0  | 1  | 12 | serious risk    | serious inconsistency    | no serious indirectness | no serious imprecision | undetected         | would not reduce effect | no | no  | very low |  |
| Δ BMI                     | SSB          | Reducing SSB consumption versus not reducing | Mattes             | 2011 | 6  | 6  | 0  | 0  | serious risk    | no serious inconsistency | no serious indirectness | serious imprecision    | NA                 | would not reduce effect | no | no  | very low |  |
| Δ BMI <sup>b</sup>        | SSB          | 1 serving/d increment                        | Malik              | 2013 | 20 | 0  | 20 | 0  | no serious risk | serious inconsistency    | no serious indirectness | no serious imprecision | undetected         | would not reduce effect | no | yes | low      |  |
| Δ Body weight             | SSB          | Highest versus lowest                        | Malik              | 2013 | 6  | 6  | 0  | 0  | no serious risk | no serious inconsistency | no serious indirectness | serious imprecision    | undetected         | would not reduce effect | no | no  | moderate |  |
| Δ Body weight             | Fructose     | Any versus none                              | Sievenpiper        | 2012 | 13 | 13 | 0  | 0  | serious risk    | no serious inconsistency | no serious indirectness | serious imprecision    | undetected         | would not reduce effect | no | no  | low      |  |

|                          |     |                       |          |      |    |   |   |    |                 |                       |                         |                        |                    |                         |    |     |          |
|--------------------------|-----|-----------------------|----------|------|----|---|---|----|-----------------|-----------------------|-------------------------|------------------------|--------------------|-------------------------|----|-----|----------|
|                          |     |                       |          |      |    |   |   |    |                 | inconsistency         | indirectness            | imprecision            |                    | reduce effect           |    |     |          |
| Δ Body weight (one year) | SSB | 1 serving/d increment | Malik    | 2013 | 8  | 0 | 8 | 0  | no serious risk | serious inconsistency | no serious indirectness | no serious imprecision | strongly suspected | would not reduce effect | no | yes | very low |
| Δ DBP <sup>c</sup>       | SSB | Highest versus lowest | Farhangi | 2020 | 14 | 0 | 4 | 10 | serious risk    | serious inconsistency | no serious indirectness | no serious imprecision | undetected         | would not reduce effect | no | no  | very low |
| Δ SBP <sup>c</sup>       | SSB | Highest versus lowest | Farhangi | 2020 | 15 | 0 | 4 | 11 | serious risk    | serious inconsistency | no serious indirectness | no serious imprecision | undetected         | would not reduce effect | no | no  | very low |

GRADE, Grading of Recommendations Assessment, Development, and Evaluation; RCT, randomized controlled trial; ADHD, Attention Deficit Hyperactivity Disorder; SSB, sugar-sweetened beverage; NA, not available; ALT, alanine aminotransferase; BMD, bone mineral density; CHD, coronary heart disease; CKD, chronic kidney disease; CVD, cardiovascular disease; HDL-C, high-density lipoprotein cholesterol; IHCL, intrahepatocellular lipids; LADA, latent autoimmune diabetes in adults; LDL-C, low-density lipoprotein cholesterol; MI, myocardial infarction; NAFLD, non-alcoholic fatty liver disease; TG, triglycerides; T2DM, type 2 diabetes mellitus; TC, total cholesterol; Δ, final value – baseline value; BMI, body mass index; DBP, diastolic blood pressure; SBP, systolic blood pressure.

<sup>a</sup> Maternal increased free sugar intake during pregnancy.

<sup>b</sup> Children.

<sup>c</sup> Children and adolescence.
